# Supplementary material for: Effect of counterion excluded volume on the conformational behavior of polyelectrolyte chains
Source: Royal Society of Chemistry journal article supplement (doi:10.1039/c7sm02335a), 2018-01-01
Supplement: c7sm02335a1.pdf [file c7sm02335a1.pdf]

Supplementary info for:

### Effect of counterion excluded volume on conformational behavior of polyelectrolyte chains

Yulia D. Gordievskaya, Alexey A. Gavrilov, Elena Yu. Kramarenko\*

\*corresponding author. E-mail: kram@polly.phys.msu.ru

Faculty of Physics, Lomonosov Moscow State University, Moscow, 119991, Russia

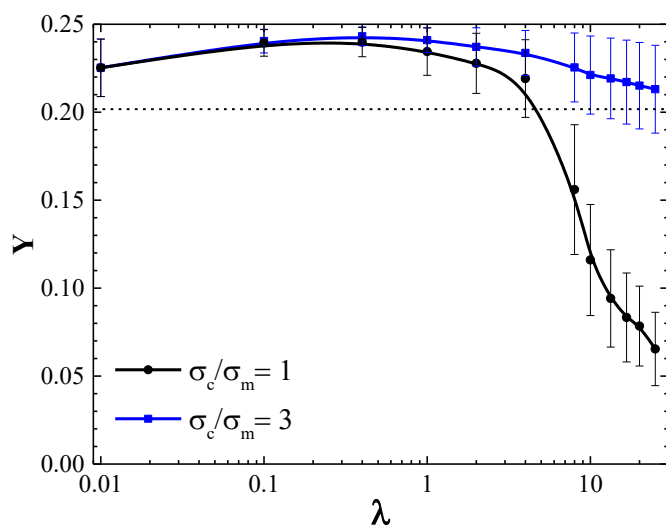

Fig.S1 Dependences of the asphericity  $Y$  on the electrostatic strength parameter  $\lambda$  for two sizes of counterions  $\sigma_c/\sigma_m$ .

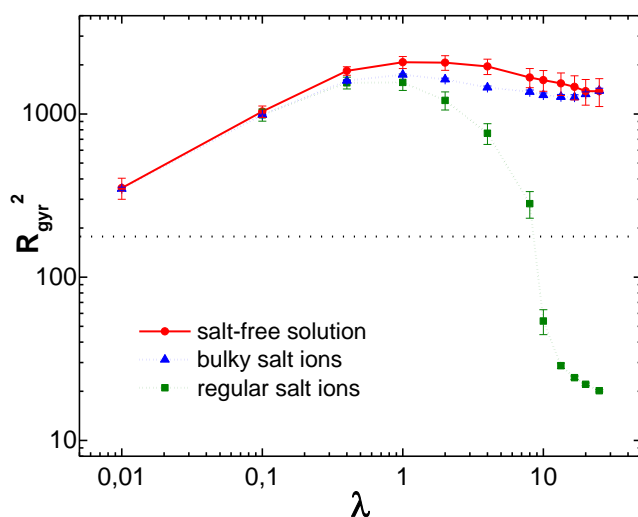

Fig. S2. Dependences of the gyration radius of the chain with bulky counterions ( $\sigma_c/\sigma_m = 3$ ) on the parameter  $\lambda$  for salt-free solution (solid line) and the solution containing salts (dotted lines). The number of salt ions of opposite charges is equal to each other and is equal to the number of the chain counterions. The salt ions carrying the same charge as the chain counterions are either bulky, i.e. of the size of the counterions (blue dotted curve) or small, i.e. of the size of a monomer unit (green dotted curve).
